# Supplementary material for: MicroRNA 17-92 Cluster Mediates ETS1 and ETS2-Dependent RAS-Oncogenic Transformation
Source: PubMed Central journal article supplement (PMC4072627; doi:10.1371/journal.pone.0100693), 2014-06-26

## Supplementary Figure S2

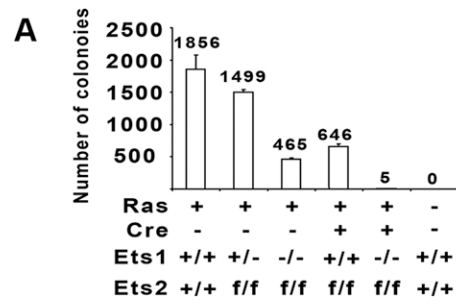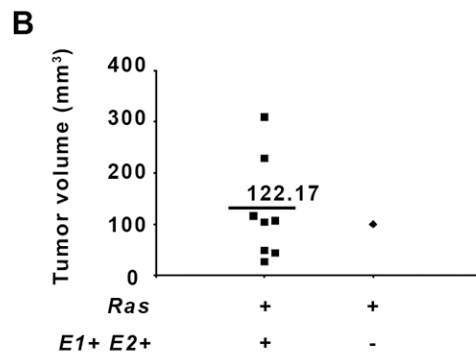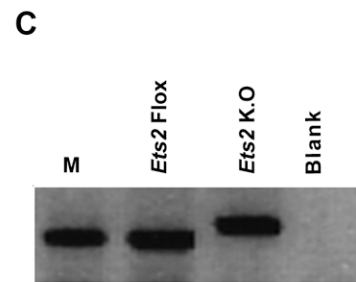

Supplement: pone.0100693.s002.pdf [file pone.0100693.s002.pdf]
